# Supplementary figures and images for: Impairment of retinal function in yellow perch (Perca flavescens) by Diplostomum baeri metacercariae
Source: PubMed Central journal article supplement — Int J Parasitol Parasites Wildl. 2018 May 6;7(2):171–9. doi: 10.1016/j.ijppaw.2018.05.001 (PMC6032499; doi:10.1016/j.ijppaw.2018.05.001), 2018-05-06

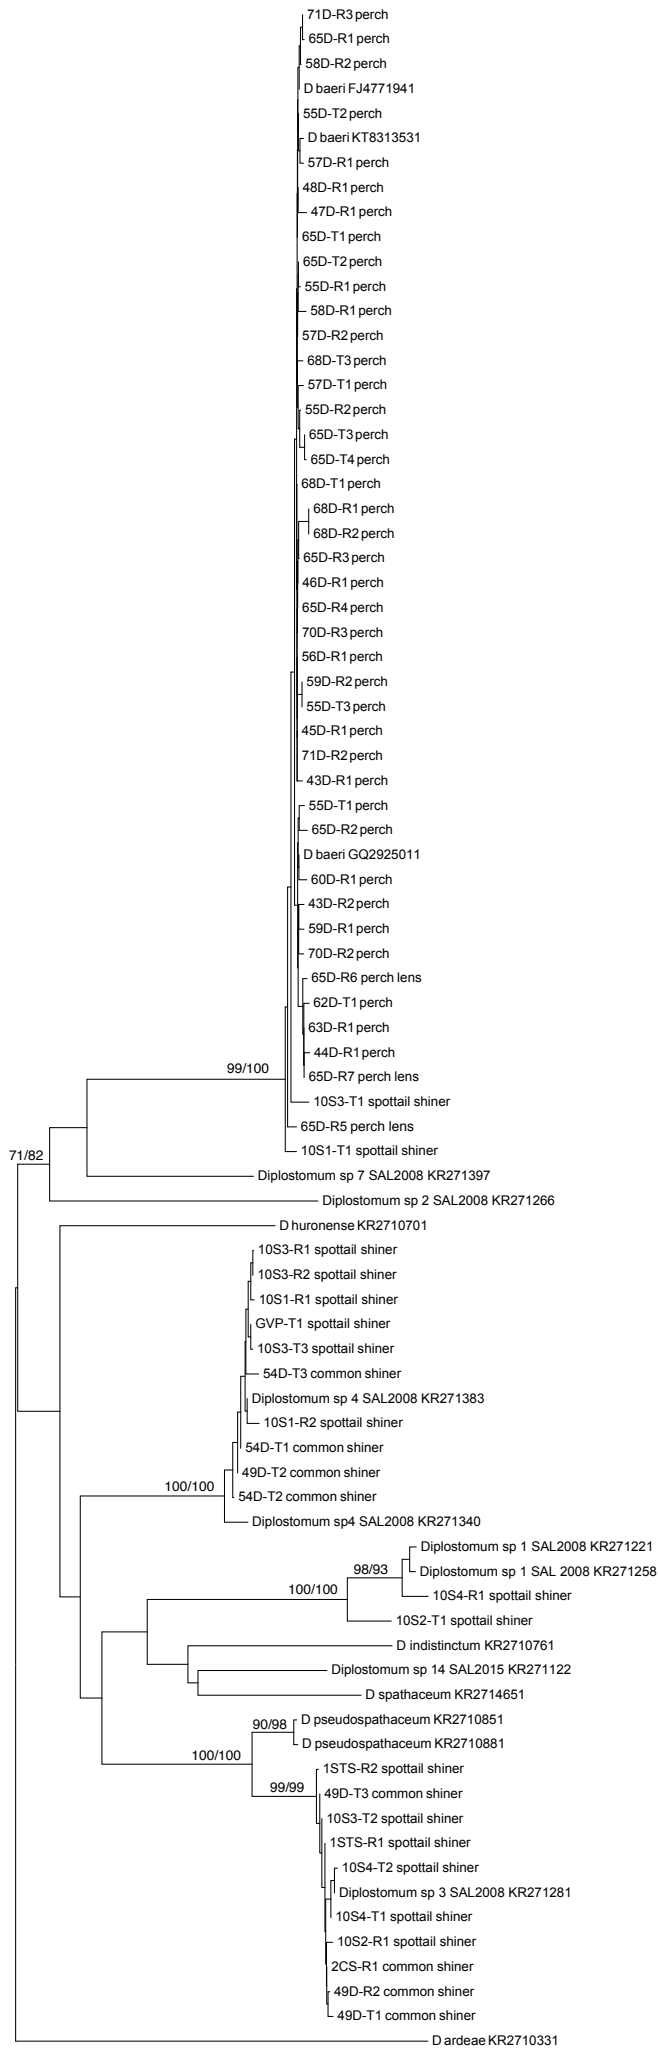

Supplement: mmc3.pdf [file mmc3.pdf]
